# Supplementary material for: Synthesis of Er3+/Yb3+codoped NaMnF3nanocubes with single-band red upconversion luminescence
Source: Royal Society of Chemistry journal article supplement (doi:10.1039/c4ra10723c), 2014-01-01
Supplement: c4ra10723c1.pdf [file c4ra10723c1.pdf]

## Supporting Information

### **Synthesis of Er<sup>3+</sup>/Yb<sup>3+</sup> codoped NaMnF<sub>3</sub> nanocubes with single-band red upconversion luminescence**

**Zhenhua Bai, Hui Lin, Kenji Imakita, Reza Montazami, Minoru Fujii and Nastaran**

**Hashemi\***

Dr. Z. Bai, Prof. R. Montazami, Prof. N. Hashemi

Department of Mechanical Engineering, Iowa State University, Ames, IA 50011, USA

E-mail: [nastaran@iastate.edu](mailto:nastaran@iastate.edu)

Dr. H. Lin, Prof. K. Imakita, Prof. M. Fujii

Department of Electrical and Electronic Engineering, Graduate School of Engineering, Kobe  
University, Rokkodai, Nada, Kobe 657-8501, Japan

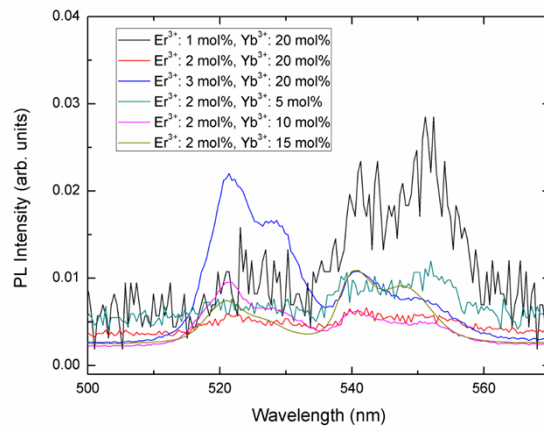

**Fig. S1** Enlarged green spectral region of upconversion luminescence from  $\text{NaMnF}_3$  nanocubes doped with various concentrations of  $\text{Er}^{3+}/\text{Yb}^{3+}$  (1~3 : 5~20 mol%).

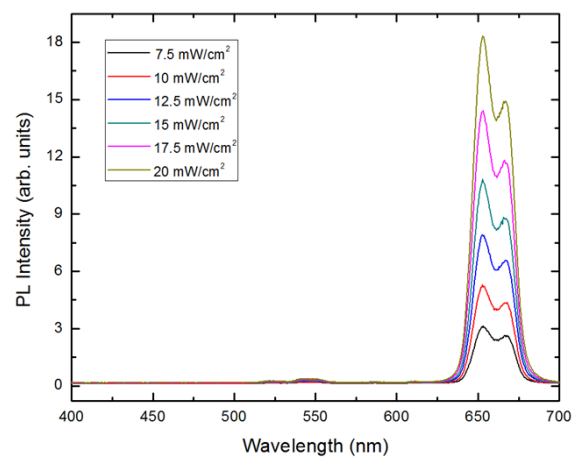

**Fig. S2** Upconversion luminescence spectra of 2 mol% Er<sup>3+</sup>/20 mol% Yb<sup>3+</sup> doped NaMnF<sub>3</sub> nanocubes under 980 nm excitation at the power density range of 7.5~30 mW/cm<sup>2</sup>.

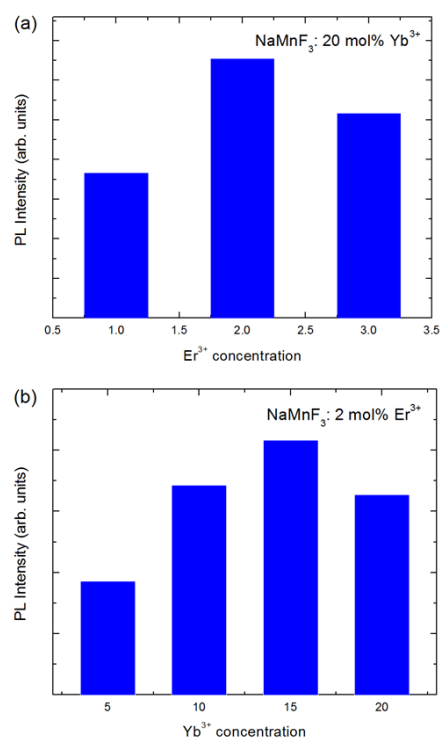

**Fig. S3** Histograms of the red luminescence intensity of (a) Er<sup>3+</sup> concentration-dependent and (b) Yb<sup>3+</sup> concentration-dependent spectra in NaMnF<sub>3</sub> nanocubes.

### Synthesis of hexagonal-phase NaYF<sub>4</sub> doped with 2 mol% Er<sup>3+</sup> and 15 mol% Yb<sup>3+</sup>

**ions:** 1.66 mL of 0.2 M YbCl<sub>3</sub> • 6H<sub>2</sub>O, 0.3 mL of 0.2 M YbCl<sub>3</sub> • 6H<sub>2</sub>O and 0.04 mL of 0.2 M ErCl<sub>3</sub> • 6H<sub>2</sub>O were sequentially added to 8 mL of 0.1 M EDTA under vigorous stirring. Then, 4 ml of 0.8 M NaF was dropwise added to the mixture. After continues stirring at room temperature for 10 min, the colloidal solution were transferred into a 20 mL Teflon-lined autoclave, sealed and heated at 200 °C for 20 h. The systems were then allowed to naturally cool to room temperature. The final products were collected by means of centrifugation, washed with ethanol and deionized water for several times to remove any possible remnants, and then dried in vacuum at 60 °C for 10 h to obtain the dried powders.

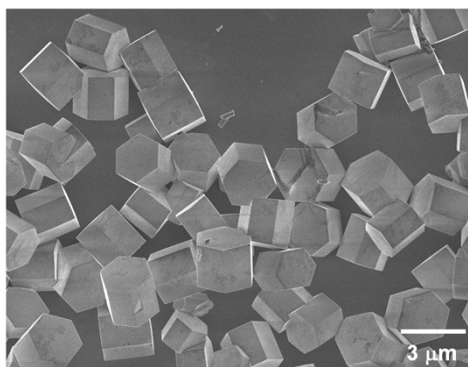

**Fig. S4** SEM image of hexagonal-phase NaYF<sub>4</sub> doped with 2 mol% Er<sup>3+</sup> and 15 mol% Yb<sup>3+</sup> ions.
